# Supplementary material for: A new supramolecular film formed from a silsesquioxane derivative for application in proton exchange membranes
Source: Royal Society of Chemistry journal article supplement (doi:10.1039/c1jm12929e), 2011-11-10
Supplement: c1jm12929e.pdf [file c1jm12929e.pdf]

**Supporting information for**

**A New Supramolecular Film Formed From a Silsesquioxane  
Derivative for Application in Proton Exchange Membranes**

Chih-Chia Cheng, Ying-Chieh Yen, Fu-Hsiang Ko, Chih-Wei Chu, Shih-Kang Fan,  
Feng-Chih Chang\*

Institute of Applied Chemistry, National Chiao-Tung University, 30050 Hsinchu,  
Taiwan

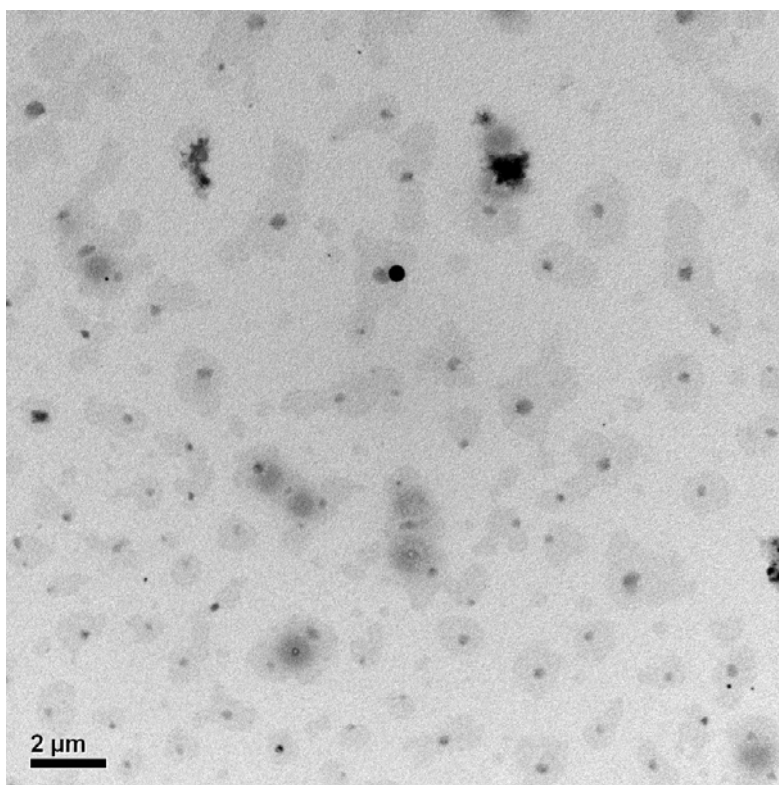

**Figure S1.** TEM micrograph of the HCl-doped POSS-C11-Py film, obtained after negative staining with  $\text{Pb}(\text{OAc})_2$

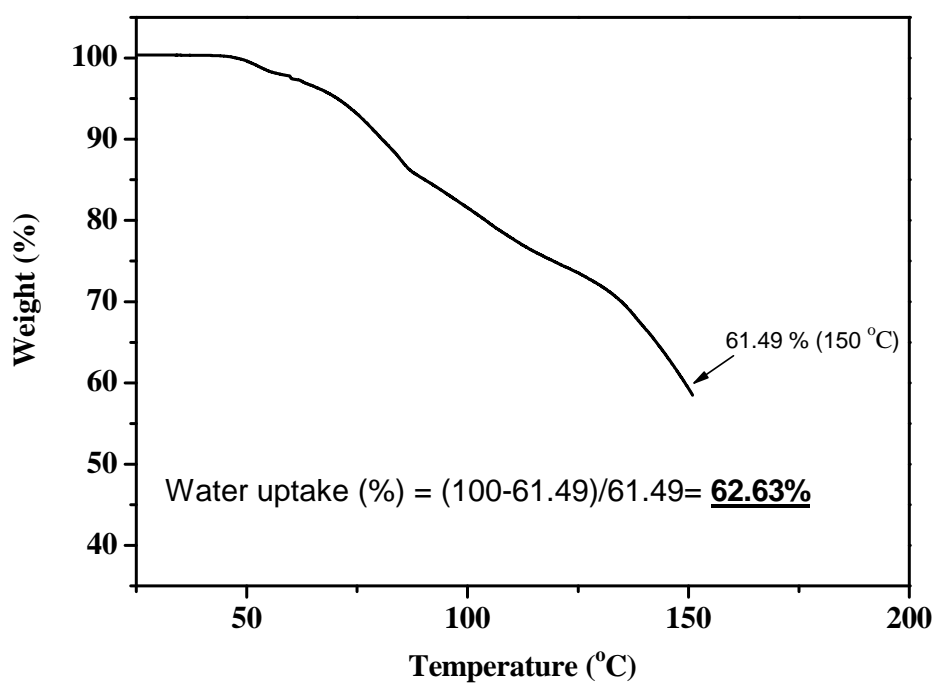

**Figure S2.** TGA curve of wet HCl-doped POSS-C11-Py membrane.

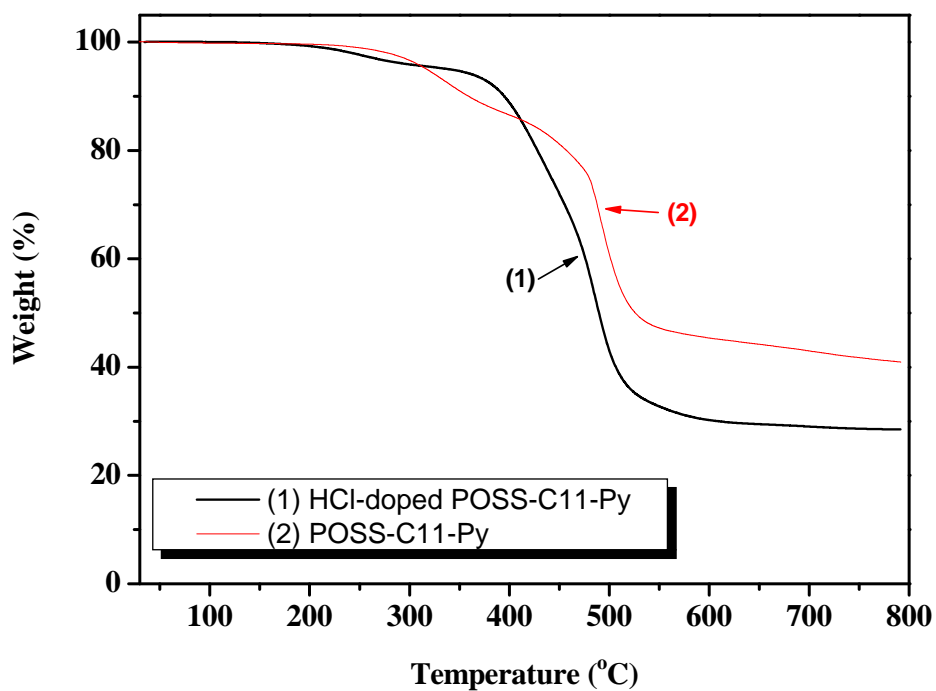

**Figure S3.** TGA curves of HCl-doped POSS-C11-Py and POSS-C11-Py membrane.

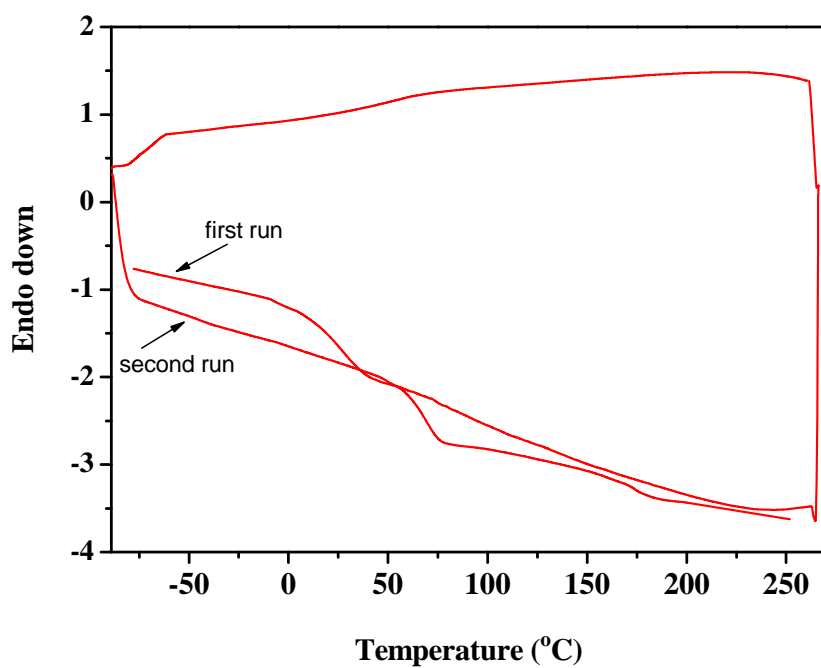

**Figure S4.** Cyclic DSC curve for the HCl-doped POSS-C11-Py membrane.

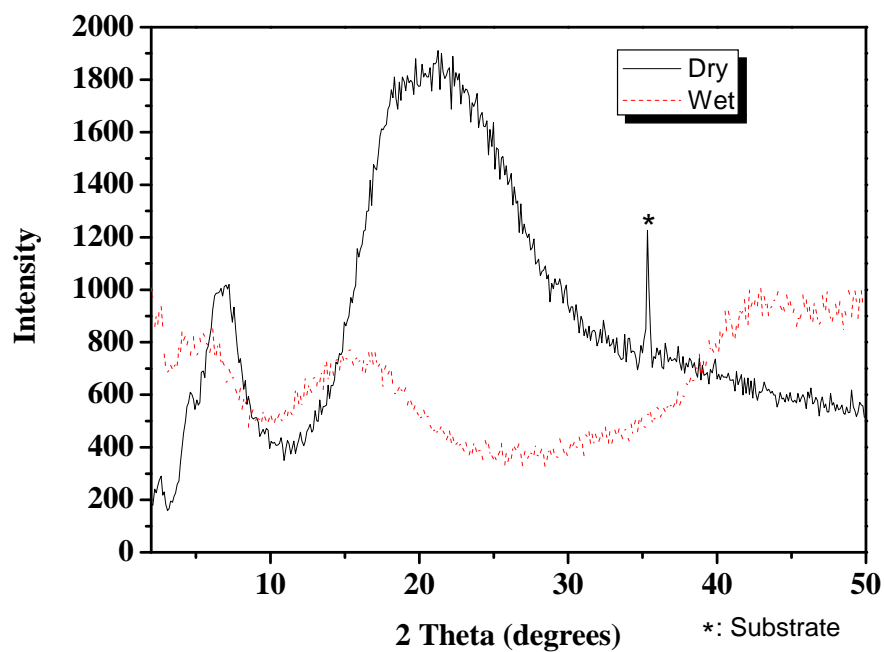

**Figure S5.** XRD data of the HCl-doped POSS-C11-Py membranes in dry and wet states.

**Table S1.** Properties of POSS-C11-Py membrane.

| Sample      | IEC<br>(meq/g)  | Water uptake<br>(%) | Proton conductivity<br>(mS cm <sup>-1</sup> ) <sup>b</sup> |
|-------------|-----------------|---------------------|------------------------------------------------------------|
| POSS-C11-Py | NA <sup>a</sup> | 12.35               | 0.0035 (90 °C)<br>0.0007 (25 °C)                           |

**a.** Nonionic films lack ionic groups and are less likely to react with NaOH.

**b.** The proton conductivity was measured at 90% RH.
